# Supplementary material for: Functional Activity of Recombinant Forms of Amh and Synergistic Action with Fsh in European Sea Bass Ovary
Source: MDPI journal article supplement (doi:10.3390/ijms221810092), 2021-09-18
Supplement: s1 [file s1]

Supplementary Materials

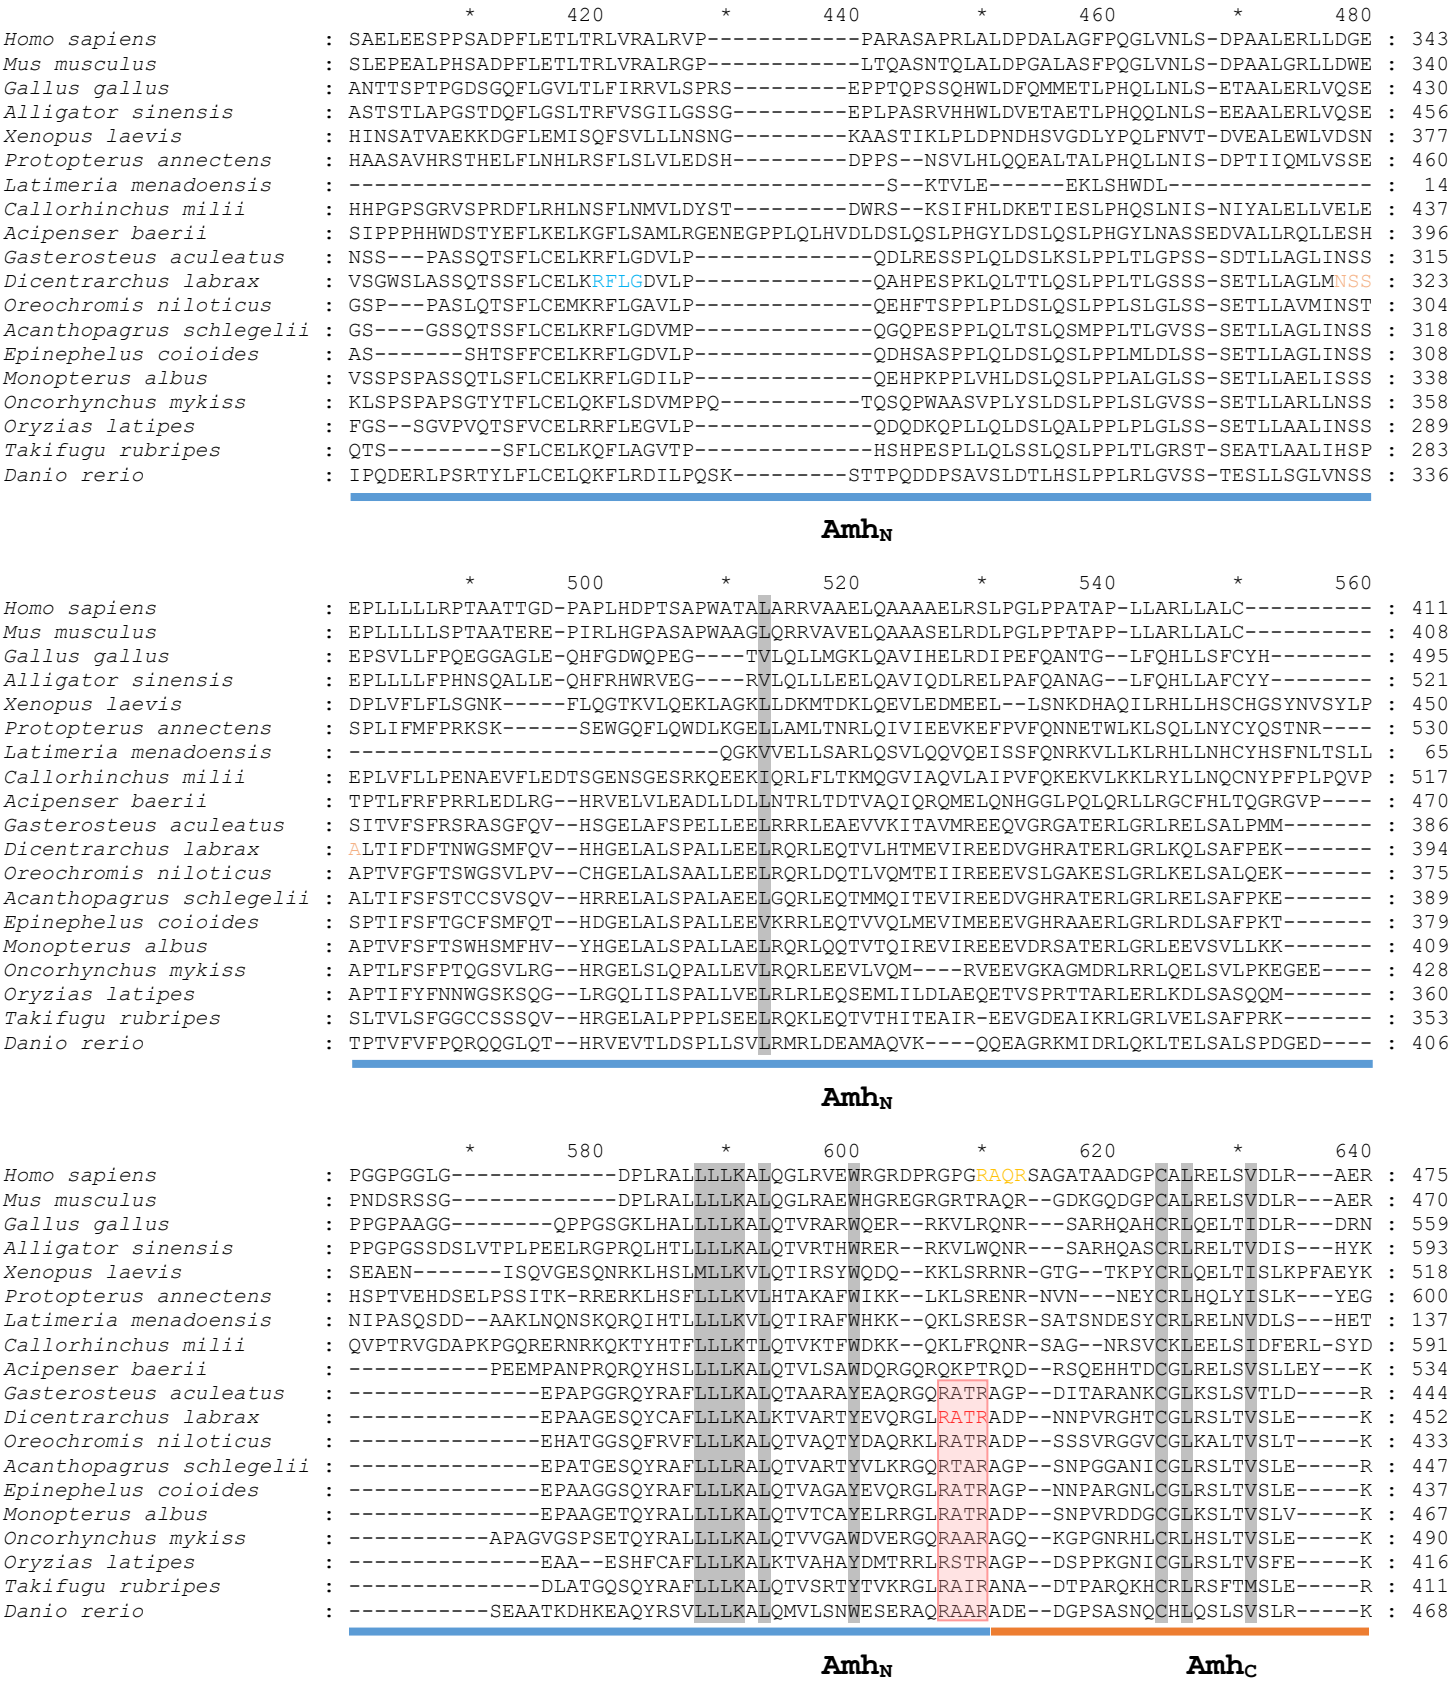

**Figure S1.** Amino acid sequence alignment showing part of the AmhN domain and the canonical cleavage site of Amh. GenBank/UniProtKB/Ensembl accession numbers: *Homo sapiens*, AAC25614.1; *Mus musculus*, CAA44912.1; *Gallus gallus*, NP\_990361.1; *Alligator sinensis*, XP\_006037226.1; *Xenopus laevis*, BAO04196.1; *Protopterus annectens*, AWT24621.1; *Latimeria menadoensis* (partial),

CCP19124.1; *Callorhynchus milii*, XP\_007896900.1; *Acipenser baerii*, AKE47491.1; *Gasterosteus aculeatus*, G3PGH3; *Dicentrarchus labrax*, CAJ78431.1; *Oreochromis niloticus*, XP\_013130583.1; *Acanthopagrus schlegelii*, ADB22521.1; *Epinephelus coioides*, AJW76790.1; *Monopterus albus*, AHF27393.1; *Oncorhynchus mykiss*, CDQ57255.1; *Oryzias latipes*, ABG24272.1; *Takifugu rubripes*, H2V975; *Danio rerio*, NP\_001007780.1. The numbers on the right refer to amino acid position. Light blue font color indicates a proprotein convertase subtilisin/kexin type 2 cleavage site predicted by iProt-Sub server that could not be proven. Mandarin font color exposes a conserved N-glycosylation site. The primary proteolytic cleavage sites in human AMH (Arg<sup>445</sup>-Ala-Gln-Arg/ Ser; yellow) and predicted subtilisin/kexin type 2 cleavage site in sea bass Amh (Arg<sup>426</sup>-Ala-Thr-Arg/ Ala; red) are indicated. The light red box highlights conservation of the sea bass predicted cleavage site Arg<sup>426</sup>-Ala-Thr-Arg among nine distantly related teleost species and gar. Amino acid similarities (80%) are boxed in grey.

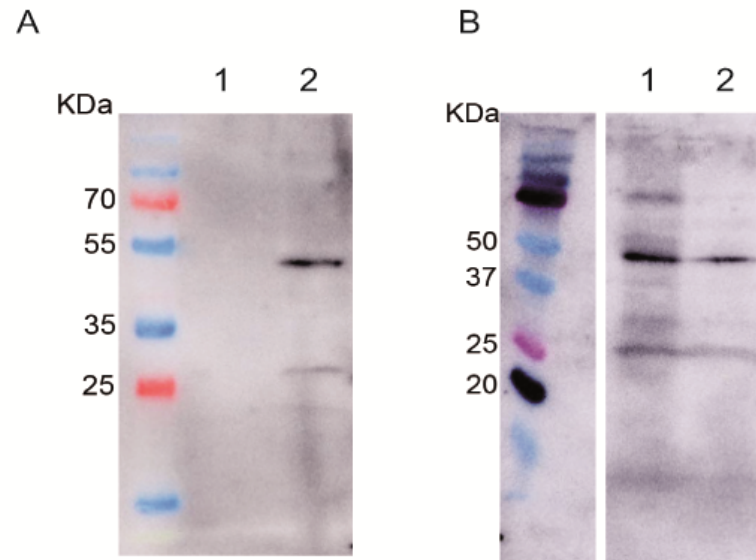

**Figure S2.** Specificity of the rabbit anti- sea bass Amhr2 antibody. (A) Total protein extracts from cells expressing the pcDNA3 empty vector as control (A, lane 1) and sea bass Amhr2 (A, lane 2). (B) Total protein extracts from sea bass previtellogenic ovary (B, lane 1) and from follicular cells (B, lane2). Approximately 40  $\mu$ g of total protein from all extracts were analyzed. Protein standards (in kDa) were used to estimate protein molecular weight.

Table S1. Primers used in this study<sup>a</sup>.

| Primer              | Position          | Sequence (5' → 3') <sup>b,c</sup>                                 |           | Annealing temp. <sup>d</sup>   |
|---------------------|-------------------|-------------------------------------------------------------------|-----------|--------------------------------|
| <i>Bam</i> HI-amh1  | 29 <sup>e</sup>   | ATAGGATCCCAGAGCAGGATGATGGTTGTG                                    | sense     | 58 °C → 68 °C<br>70 °C → 65 °C |
| amh2                | 1460 <sup>e</sup> | ACTGTAAGGTGGTCAGCTGGA                                             | antisense | 64 °C → 59 °C                  |
| amh3                | 863 <sup>e</sup>  | CTGAAGCGGTTCTGGGCG                                                | sense     | 52 °C → 62 °C                  |
| amh4- <i>Eco</i> RI | 1704 <sup>e</sup> | ATCGAATTCACCAACTAAAGACTATGTGAAAC                                  | antisense | 58 °C → 68 °C<br>70 °C → 65 °C |
| amh10               | 1 <sup>f,g</sup>  | AATGGGAATTCCTGCAGGTCTCACAAGGACT                                   | sense     | 58 °C → 68 °C<br>65 °C         |
| amh12               | 1210 <sup>g</sup> | GAGAAGCGAGCTGACCCCAACAACCCA                                       | sense     | 58 °C → 68 °C                  |
| amh13               | 1574 <sup>f</sup> | TACGACCTAGGTTTAGCGGCATCCACACTCC                                   | antisense | 58 °C → 68 °C<br>65 °C         |
| amh14               | 1247 <sup>f</sup> | gtggtggtgatggtggtgTCGCTTCTCCAGTCCTCTCTGCACCTCAT                   | antisense | 58 °C → 68 °C                  |
| amh15               | 1210 <sup>f</sup> | GAGAAGCGAcaccaccatcaccaccacGCTGACCCCAACAACCCAG                    | sense     | 58 °C → 68 °C                  |
| amh16               | 1567 <sup>g</sup> | TACGACCTAGGTTAggtggtggtgatggtggtgACGACCTTCGATGCGGCATCCACACTCCCGTG | antisense | 58 °C → 68 °C<br>65 °C         |
| amh17               | 1249 <sup>g</sup> | ACTGGGTTGTTGGGGTCAGCTCGCTTCTCCAGTCCTCTCTGCACCTCAT                 | antisense | 58 °C → 68 °C                  |
| 5' AOX1             | 855 <sup>h</sup>  | GACTGGTTCCAATTGACAAGC                                             | sense     | 54 °C                          |
| 3' AOX1             | 1347 <sup>h</sup> | GGCAAATGGCATTCTGACATCCT                                           | antisense | 54 °C                          |

<sup>a</sup> Primers were obtained from Invitrogen or Isogen (Thermo Fisher Scientific; Isogen Life Science).

<sup>b</sup> Underlined sequences indicate restriction enzyme sites for cloning purposes. <sup>c</sup> Lower case letters code for Histidines.

<sup>d</sup> Touch-down or -up PCR maximum and minimum annealing temperatures.

<sup>e</sup> Position in *Dicentrarchus labrax amh* cDNA sequence with GenBank accession no. AM232701.1. <sup>f</sup> Position in *Dicentrarchus labrax amh* cDNA sequence in pPICK9-His6Amh.

<sup>g</sup> Position in *Dicentrarchus labrax amh* cDNA sequence pPICK9-AmhHis6. <sup>h</sup> Position in pPICK9 vector.

**Table S2.** Primers and hydrolysis probe used for quantitative real-time PCR.

| Gene                                     | Sequence (5' → 3') <sup>a</sup>            | nM <sup>d</sup> | Amplicon size | Efficiency | First published |
|------------------------------------------|--------------------------------------------|-----------------|---------------|------------|-----------------|
| <i>amhr2</i> (JQ801443.1) <sup>b</sup>   | fw: CCATCCTGCGTTCTTGTTCA                   | 300             | 67 bp         | 0.97       | [A] ([30])      |
|                                          | rv: TGAGCAAGACCCATGTTTGC                   | 300             |               |            |                 |
|                                          | pr: [6~FAM]AATCGCCACTGGTCGAGCCACAC[TAMRA]  | 125             |               |            |                 |
| <i>amh</i> (AM232701.1) <sup>b</sup>     | fw: TCCAAACACTGCTAACATCAACAA               | 50              | 74 bp         | 0.94       | [B] ([21])      |
|                                          | rv: TGGCGTGGTTCTTGGGATT                    | 300             |               |            |                 |
|                                          | pr: [6~FAM]CCATGGCTCATGTGCTTTCCCCCT[TAMRA] | 125             |               |            |                 |
| <i>cyp19a1</i> (AJ311177.1) <sup>b</sup> | fw: TCCTCGCCGCTACTTCCA                     | 300             | 65 bp         | 0.98       | [C] ([61])      |
|                                          | rv: TGGCGATGTGCTTACCAACA                   | 300             |               |            |                 |
|                                          | pr: [6 ~ FAM]CATTCGGTTCAGGCCCTCGCG[TAMRA]  | 100             |               |            |                 |
| <i>rpl13a</i> (DT044539) <sup>b</sup>    | fw: TCTGGAGGACTGTCAGGGGCATGC               | 100             | 148 bp        | 0.91       | [D] ([72])      |
|                                          | rv: AGACGCACAATCTTGAGAGCAG                 | 100             |               |            |                 |
| <i>luc1</i> (MH759210.1) <sup>c</sup>    | fw: TACAACACCCCAACATCTTCGA                 | 900             | 67 bp         | 0.96       | This study      |
|                                          | rv: GGAAGTTCACCGGCGTCAT                    | 900             |               |            |                 |
|                                          | pr: [6 ~ FAM]CGGGCGTGGCAGGTCTTCCC[TAMRA]   | 200             |               |            |                 |

<sup>a</sup> Forward (fw) and reverse (rv) primers were obtained from Invitrogen™ (Life Technologies). Hydrolysis probe (pr) was purchased from Eurofins Genomics, Germany.

<sup>b</sup> GenBank accession no. for sea bass gene.

<sup>c</sup> GenBank accession no. for *Photinus pyralis* voucher KSH 11044

<sup>d</sup> Amount of primer or probe in the PCR.

21. Halm, S.; Rocha, A.; Miura, T.; Prat, F.; Zanuy, S. Anti-Müllerian hormone (AMH/AMH) in the European sea bass: its gene structure, regulatory elements, and the expression of alternatively-spliced isoforms. *Gene* **2007**, *388*, 148–158, doi:10.1016/j.gene.2006.10.018.
30. Rocha, A.; Zanuy, S.; Gómez, A. Conserved anti-müllerian hormone: Anti-müllerian hormone type-2 receptor specific interaction and intracellular signaling in teleosts. *Biol. Reprod.* **2016**, *94*, doi:10.1095/biolreprod.115.137547.
61. Rocha, A.; Zanuy, S.; Carrillo, M.; Gómez, A. Seasonal changes in gonadal expression of gonadotropin receptors, steroidogenic acute regulatory protein and steroidogenic enzymes in the European sea bass. *Gen. Comp. Endocrinol.* **2009**, *162*, doi:10.1016/j.ygcen.2009.03.023.
72. Mitter, K.; Kotoulas, G.; Magoulas, A.; Mulero, V.; Sepulcre, P.; Figueras, A.; Novoa, B.; Sarropoulou, E. Evaluation of candidate reference genes for QPCR during ontogenesis and of immune-relevant tissues of European seabass (*Dicentrarchus labrax*). *Comp. Biochem. Physiol. Part B Biochem. Mol. Biol.* **2009**, *153*, 340–347, doi:https://doi.org/10.1016/j.cbpb.2009.04.009.
